# Supplementary material for: Insecticide Susceptibilities and Enzyme Activities of Four Stink Bug Populations in Mississippi, USA
Source: MDPI journal article supplement (doi:10.3390/insects15040265), 2024-04-12
Supplement: s1 [file s1]

**Table S1.** The commercial name, common name (with percentage active ingredient), manufacturer, mode of action (MOA) for insecticides and rates used on stink bug spp.

|   | Commercial Name | Common Name (% a. i)  | Manufacturer      | Mode of Action | Amount of for- mulation per Acre | Pounds Active Ingredient per Acre |
|---|-----------------|-----------------------|-------------------|----------------|----------------------------------|-----------------------------------|
| 1 | Vydate C-LV     | Oxamyl (42%)          | Dupont            | 1A             | 1.5-4 pt                         | 0.24-0.64                         |
| 2 | Bracket         | Acephate (97%)        | Winfield Solution | 1B             | 0.056-1.1 lb                     | 0.056-1.1                         |
| 3 | Tundra®EC       | Bifenthrin (25.1%)    | Winfield Solution | 3A             | 2.1-6.4 oz                       | 0.033-0.1                         |
| 4 | Warrior II      | λ-cyhalothrin (22.8%) | Syngenta          | 3A             | 1.60-2.56 oz                     | 0.025-0.04                        |
| 5 | Advise®2FL      | Imidacloprid (40.4%)  | Winfield Solution | 4A             | 2.0-3.0 oz                       | 0.02-0.04                         |
| 6 | Centric 40WG    | Thiamethoxam (40%)    | Syngenta          | 4A             | 2.0-2.5 oz                       | 0.02-0.03                         |
| 7 | Transform       | Sulfoxaflor (50%)     | Syngenta          | 4C             | 0.75-2.75 oz                     | 0.023-0.086                       |

**Table S2.** Spray bioassay results (LC<sub>90</sub>) of seven formulated insecticides against the adult green stink bug, *Chinavia halaris*; southern green stink bug, *Nezara Viridula*; brown stink bug, *Euschistus Servus*; red banded stink bug, *Piezodorus guildinii* 48 hours post-treatment from SIMRU Farm, Leland, MS. during 22022 and 2023.

| Compounds <sup>1</sup> | Population SIMRU-2022 | LC <sub>90</sub> (µg/mL) <sup>2</sup> | 95% Confidence Intervals (µg/mL) <sup>2</sup> | Population SIMRU-2023 | LC <sub>90</sub> (µg/mL) <sup>2</sup> | 95% Confidence Intervals (µg/mL) <sup>2</sup> |
|------------------------|-----------------------|---------------------------------------|-----------------------------------------------|-----------------------|---------------------------------------|-----------------------------------------------|
| Oxamyl                 | <i>C. halaris</i>     | 305.3 <sup>a</sup>                    | 213.7– 562.8                                  | <i>C. halaris</i>     | 347.9 <sup>b</sup>                    | 158.9– 1312.8                                 |
|                        | <i>N. viridula</i>    | 371.2 <sup>a</sup>                    | 287.6 – 567.2                                 | <i>E. servus</i>      | 1835.6 <sup>a</sup>                   | 836.6 – 4308.2                                |
|                        | <i>P. guildinii</i>   | 243.8 <sup>a</sup>                    | 207.0 – 305.9                                 | <i>P. guildinii</i>   | 227.3 <sup>b</sup>                    | 183.2 – 321.5                                 |
| Acephate               | <i>C. halaris</i>     | 445.9 <sup>a</sup>                    | 319.7 – 814.9                                 | <i>C. halaris</i>     | 558.1 <sup>a</sup>                    | 315.8 – 1537.1                                |
|                        | <i>N. viridula</i>    | 395.4 <sup>a</sup>                    | 328.9 – 547.4                                 | <i>E. servus</i>      | 489.6 <sup>a</sup>                    | 397.6 – 920.7                                 |
|                        | <i>P. guildinii</i>   | 138.2 <sup>b</sup>                    | 114.3 – 181.6                                 | <i>P. guildinii</i>   | 97.28 <sup>b</sup>                    | 80.80 – 130.4                                 |
| Bifenthrin             | <i>C. halaris</i>     | 24.63 <sup>a</sup>                    | 15.71 – 57.86                                 | <i>C. halaris</i>     | 27.48 <sup>a</sup>                    | 15.19 – 112.6                                 |
|                        | <i>N. viridula</i>    | 21.81 <sup>a</sup>                    | 14.92 – 42.91                                 | <i>E. servus</i>      | 83.63 <sup>a</sup>                    | 60.99 – 145.4                                 |
|                        | <i>P. guildinii</i>   | 38.32 <sup>a</sup>                    | 25.80 – 76.93                                 | <i>P. guildinii</i>   | 27.21 <sup>a</sup>                    | 15.80 – 98.45                                 |
| λ-Cyhalothrin          | <i>C. halaris</i>     | 55.51 <sup>a</sup>                    | 20.16 – 153.7                                 | <i>C. halaris</i>     | 36.37 <sup>b</sup>                    | 12.64 – 89.39                                 |
|                        | <i>N. viridula</i>    | 17.99 <sup>a</sup>                    | 10.71 – 81.70                                 | <i>E. servus</i>      | 204.20 <sup>a</sup>                   | 98.51 – 479.4                                 |
|                        | <i>P. guildinii</i>   | 50.83 <sup>a</sup>                    | 33.68 – 101.0                                 | <i>P. guildinii</i>   | 26.47 <sup>b</sup>                    | 19.25 – 50.12                                 |
| Imidacloprid           | <i>C. halaris</i>     | 92.53 <sup>b</sup>                    | 58.11 – 231.8                                 | <i>C. halaris</i>     | 51.86 <sup>b</sup>                    | 37.52 – 107.7                                 |
|                        | <i>N. viridula</i>    | 309.41 <sup>a</sup>                   | 191.6 – 775.3                                 | <i>E. servus</i>      | 591.6 <sup>a</sup>                    | 274.9 – 1692.4                                |
|                        | <i>P. guildinii</i>   | 92.08 <sup>b</sup>                    | 66.26 – 153.15                                | <i>P. guildinii</i>   | 47.27 <sup>b</sup>                    | 29.20 – 96.43                                 |
| Thiamethoxam           | <i>C. halaris</i>     | 56.57 <sup>a</sup>                    | 34.36 –217.0                                  | <i>C. halaris</i>     | 79.56 <sup>b</sup>                    | 57.81 –175.5                                  |
|                        | <i>N. viridula</i>    | 80.81 <sup>a</sup>                    | 49.49 – 231.2                                 | <i>E. servus</i>      | 296.6 <sup>a</sup>                    | 183.4 – 983.4                                 |
|                        | <i>P. guildinii</i>   | 65.76 <sup>a</sup>                    | 47.13 – 112.5                                 | <i>P. guildinii</i>   | 61.66 <sup>b</sup>                    | 35.70 – 171.8                                 |
| Sulfoxaflor            | <i>C. halaris</i>     | 516.8 <sup>a</sup>                    | 360.2 – 1074.0                                | <i>C. halaris</i>     | 429.8 <sup>a</sup>                    | 358.6 – 695.0                                 |
|                        | <i>N. viridula</i>    | 677.1 <sup>a</sup>                    | 472.8 – 1278.4                                | <i>E. servus</i>      | 717.4 <sup>a</sup>                    | 542.3 – 2338.8                                |
|                        | <i>P. guildinii</i>   | 307.1 <sup>a</sup>                    | 193.9 – 821.1                                 | <i>P. guildinii</i>   | 180.9 <sup>b</sup>                    | 102.4 – 326.3                                 |

<sup>1</sup> All the compounds were formulated pesticides.

<sup>2</sup> LC<sub>50</sub> values and 95% confidence intervals were calculated by Probit analyses using SPSS software. Letters a and b indicate significant difference with no overlap in the 95% confidence intervals between different stink bug populations.

**Table S3.** The enzyme activities of esterase, glutathione S-transferases (GST), cytochrome p450 complex (P450) and acetylcholinesterase (AChE) in green stink bug, *Chinavia halaris*; southern green stink bug, *Nezara Viridula*; brown stink bug, *Euschistus servus* and red banded stink bug, *Piezodorus guildinii* from three different populations: SIMRU-2022, SIMRU-2023 and Clarksdale-2023.

| Species             | Population      | Esterase<br>(nmol/min/mg)  | GST<br>(μmol/min/mg) | AChE<br>(pmol/min/mg) | P450<br>(pmol/min/mg)    |
|---------------------|-----------------|----------------------------|----------------------|-----------------------|--------------------------|
| <i>C. halaris</i>   | SIMRU-2022      | 56.86 ± 3.55               | 419.03 ± 24.73       | 0.19 ± 0.02           | 1.44 ± 0.25              |
|                     | SIMRU-2023      | 38.16 ± 4.87               | 395.25 ± 44.97       | 0.18 ± 0.02           | 1.04 ± 0.13              |
|                     | Clarksdale-2023 | 33.64 ± 3.08               | 302.24 ± 15.73       | 0.16 ± 0.01           | 1.36 ± 0.13              |
| <i>N. viridula</i>  | SIMRU-2022      | 27.20 ± 2.37               | 276.68 ± 13.56       | 0.15 ± 0.01           | 1.40 ± 0.15              |
|                     | SIMRU-2023      | 28.14 ± 2.75               | 439.88 ± 51.26       | 0.19 ± 0.01           | 1.70 ± 0.26              |
| <i>P. guildinii</i> | SIMRU-2022      | 65.71 ± 4.38               | 221.47 ± 12.08       | 0.17 ± 0.01           | 1.92 ± 0.10 <sup>a</sup> |
|                     | SIMRU-2023      | 37.09 ± 4.56               | 134.69 ± 5.78        | 0.17 ± 0.00           | 0.78 ± 0.04 <sup>b</sup> |
|                     | Clarksdale-2023 | 42.40 ± 4.97               | 218.65 ± 13.36       | 0.22 ± 0.02           | 2.15 ± 0.27 <sup>a</sup> |
| <i>E. servus</i>    | SIMRU-2022      | 109.83 ± 6.81 <sup>a</sup> | 62.76 ± 3.32         | 0.14 ± 0.01           | 0.63 ± 0.03 <sup>a</sup> |
|                     | SIMRU-2023      | 35.19 ± 3.75 <sup>b</sup>  | 67.49 ± 3.68         | 0.08 ± 0.01           | 0.34 ± 0.02 <sup>b</sup> |
|                     | Clarksdale-2023 | 89.96 ± 12.08 <sup>a</sup> | 78.27 ± 8.61         | 0.12 ± 0.01           | 0.70 ± 0.14 <sup>a</sup> |

Statistically significant differences were identified within each group of enzymes, sharing different letter are significantly different, as determined using one-way analysis of variance with Tukey's HSD test, and significant values were set at  $p < 0.05$ .
